# Supplementary material
Source: PubMed Central journal article supplement (PMC7092732)

Supplemental Figure  
Flow Chart Hert et al.

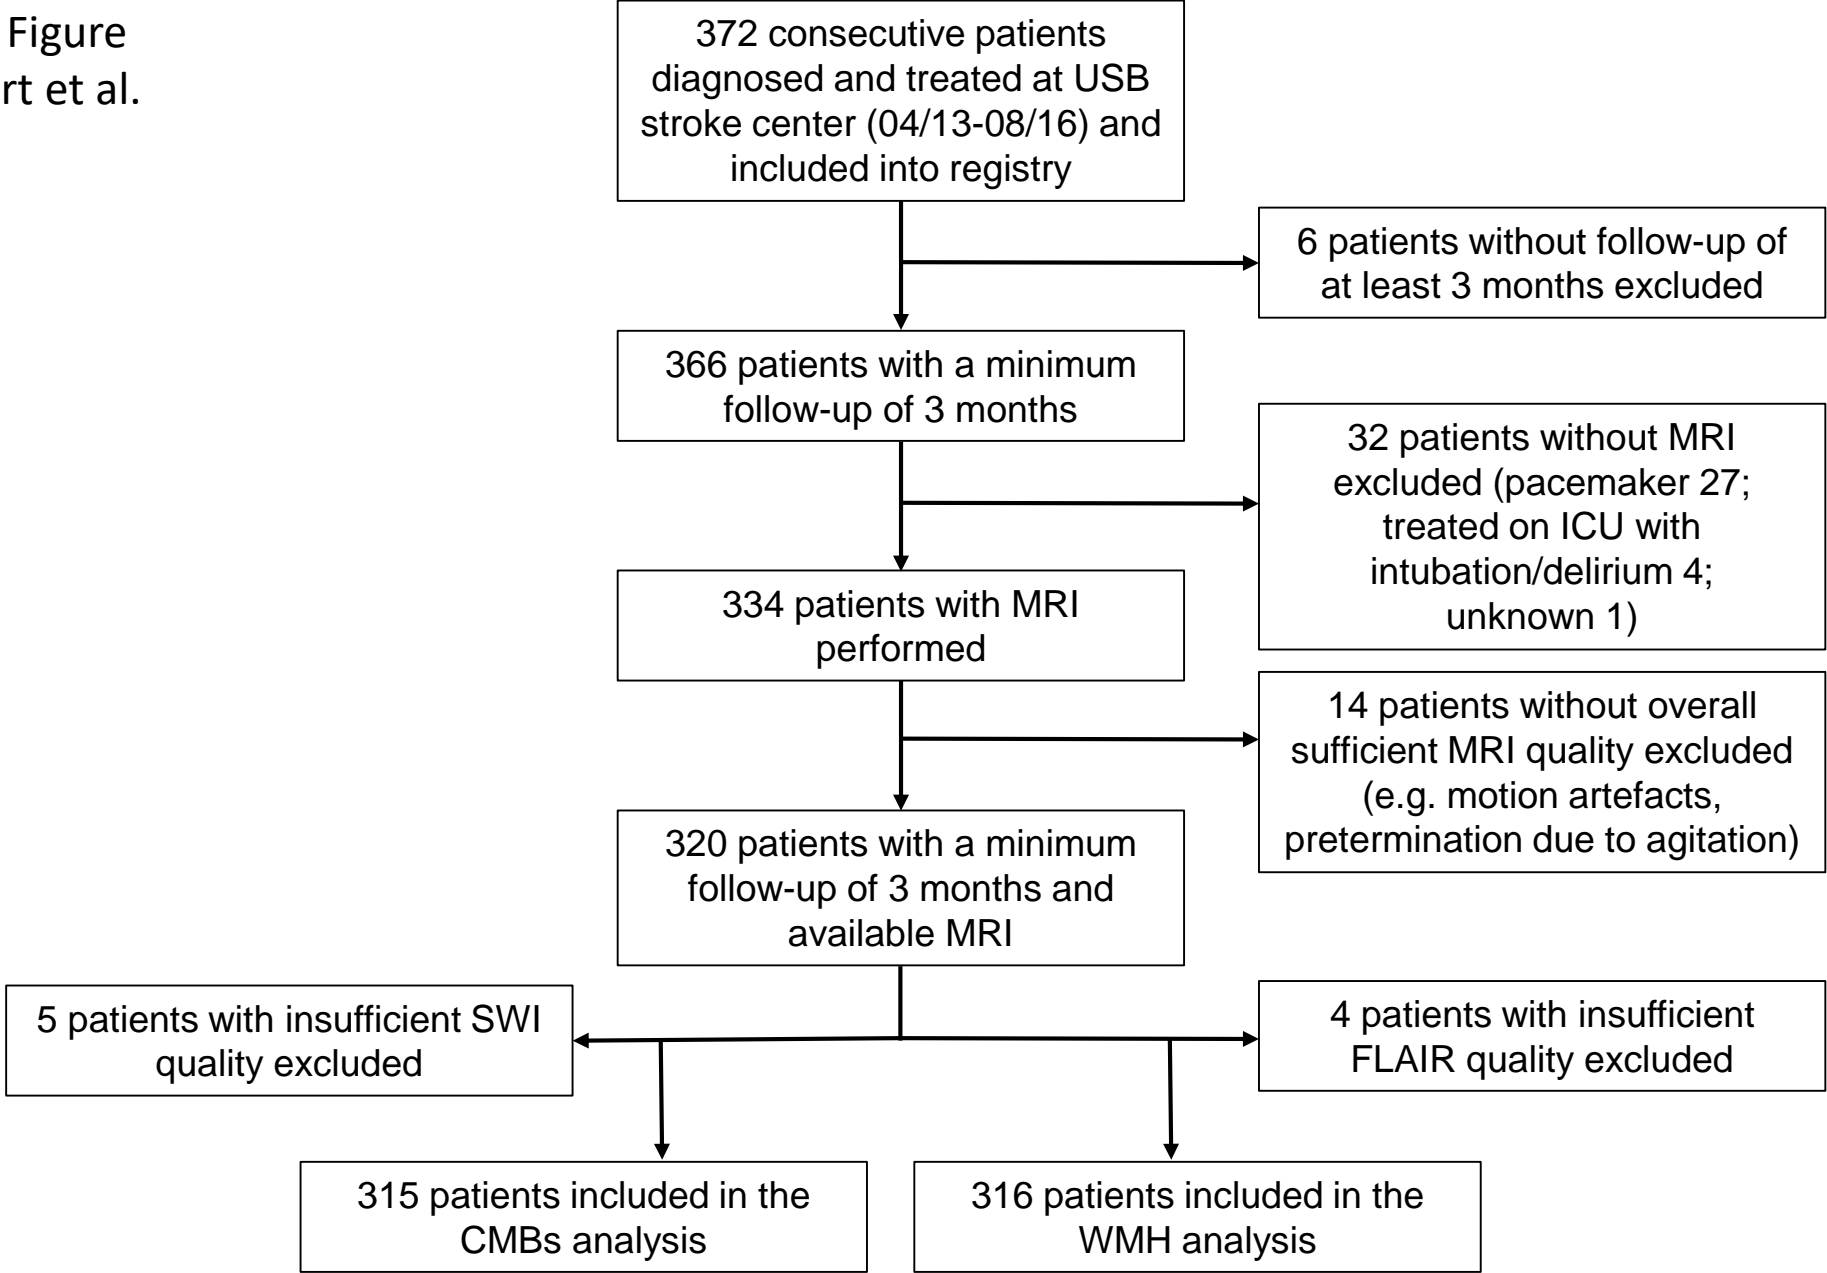

Supplement: ESO888016_Supplementary_material.pdf [file ESO888016_Supplementary_material.pdf]
